# Supplementary material
Source: PubMed Central journal article supplement (PMC3496273)
Supplement: NIHMS395160-supplement-supplement_1.pdf [file NIHMS395160-supplement-supplement_1.pdf]

506

507

508

509 **Appendix**

510 **Supplement to:**

511 Akullian AN, Lu D, McDowell JZ, Davis GM, Spear RC, Remais JV. Modeling the combined influence of  
512 host dispersal and waterborne fate and transport on pathogen spread in complex landscapes. *Water*  
513 *Quality, Exposure and Health*, 2012.

514

515

516

517

518

519

520

521

522

523

524

525

526

527

528

529

530

531

532

533

534

535 **Figure 1A. Snail release points along the study ditch used for the mass mark release**  
536 **(MMR) study.**

537

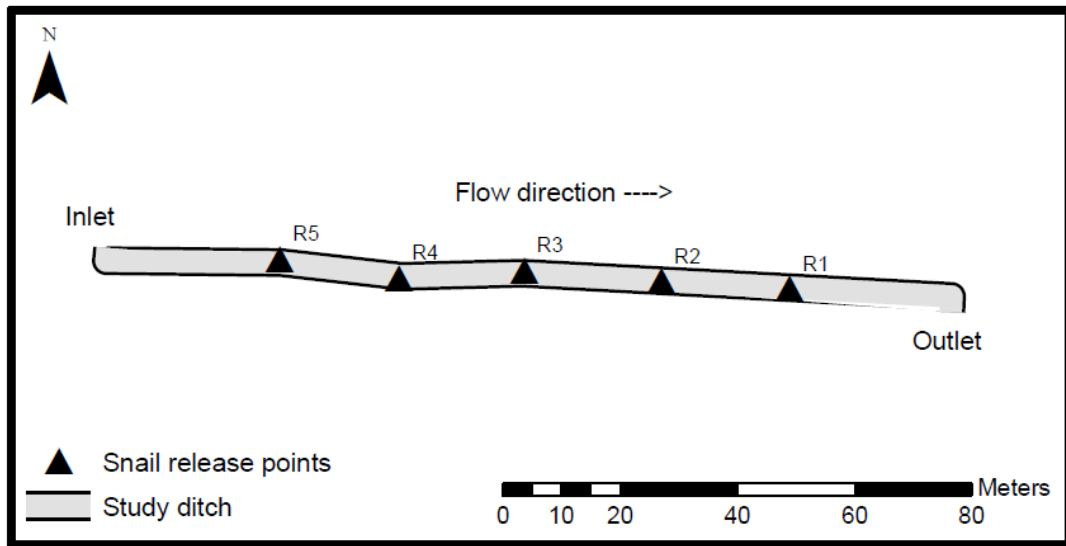

538

539

540

541

542

543

544

545

546

547

548

549

550

551

552

553

554

555

556

557

558

559

560

561  
562  
563  
564  
565  
566  
567

568 **Figure 2A. Fluorescence levels of Rhodamine WT dye in collected water samples at two**  
569 **distances (100 and 250 meters) downstream from dye release in two concrete irrigation**  
570 **ditches (A and B)**

571  
572

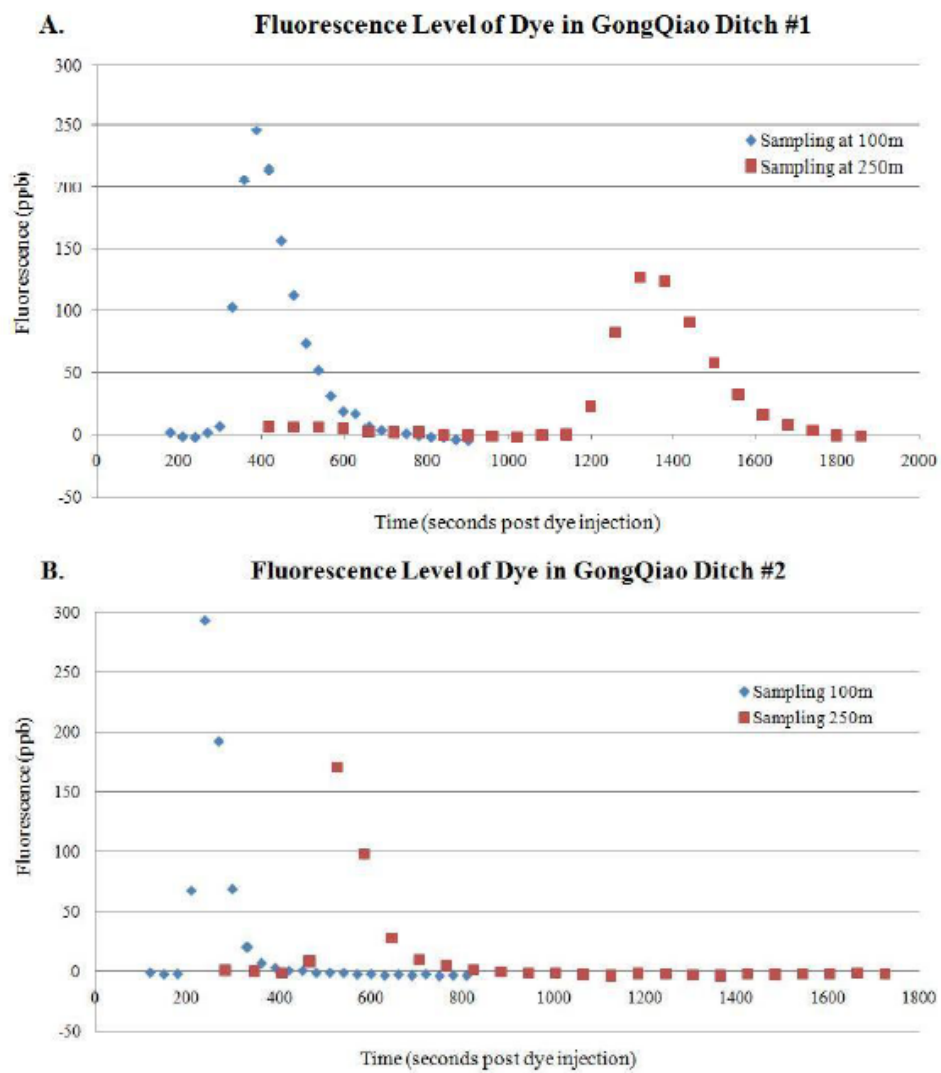

573

574

575

576

577

578

579 **Figure 3A. Dispersing snail counts decrease with distance downstream from the upstream**  
580 **source village (filled triangle) based on a starting population ( $n=1.87 \times 10^5$ ) subject to the**  
581 **distance decay equation derived from the MMR study.**

582

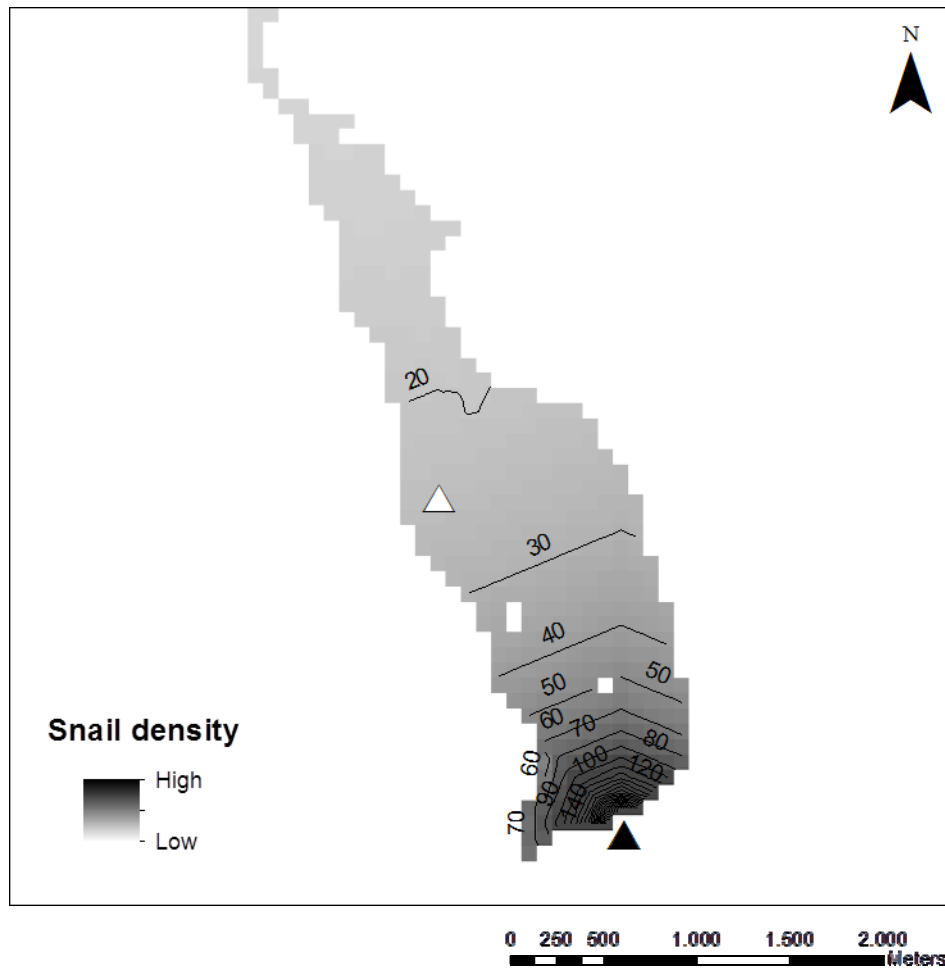

583

584

585

586

587
